# Supplementary material for: High-resolution pediatric reference intervals for 15 biochemical analytes described using fractional polynomials
Source: publisher site journal article supplement (doi:10.1515/cclm-2020-1371), 2021-02-10
Supplement: Supplementary file 1 [file j_cclm-2020-1371_suppl.docx]

# Supplemental Table 1 Participating centers and respective analytical devices.

| **Code** | **Center (all in Germany)** | **Analytical device(s)** | **Samples’ time range** |
| --- | --- | --- | --- |
| A | University Hospital Erlangen, Erlangen | Roche cobas integra 800 | 2008-2016 |
| B | University Hospital of Würzburg, Würzburg | Roche cobas 8000 | 2010-2017 |
| C | University Medical Centre Ulm, Ulm | Roche cobas 6000 and 8000 | 2010-2017 |
| D | University Hospital Augsburg, Augsburg | Roche cobas 8000 | 2012-2016 |
| E | MVZ Labor PD Dr. Volkmann und Kollegen, Karlsruhe | Roche cobas 8000 | 2012-2017 |
| F | University Hospital of Cologne, Cologne | Roche cobas | 2010-2016 |
| G | Institute of Clinical Chemistry, MHH, Hannover | Roche cobas 6000, c501 | 2009-2017 |
| H | MVZ wagnerstibbe, amedes Gruppe, Hannover | Roche cobas 8000, Beckman Coulter AU5800/AU2700 | 2015-2017 |
| I | University Hospital Schleswig-Holstein, Kiel | Roche cobas 8000 | 2013-2017 |
| J | Klinikum Bremen-Nord, Bremen | Roche cobas c501 | 2010-2016 |
| L | Regionale Kliniken Holding RKH GmbH, Ludwigsburg | Vitros 5600 and Roche cobas integra 800, Roche cobas 8000 | 2014-2017 |
| M | Children's and Youth Hospital Auf der Bult, Hannover | Dim Xpand and Dimension ExL | 2004-2017 |
| P | University Hospital Freiburg, Freiburg | Roche cobas 6000 | 2012-2018 |

Centers’ codes are non-consecutive, as not all PEDREF centers were included in this analysis. PEDREF, Next-Generation Pediatric Reference Intervals.

# Supplemental Table 2 Analytical methods.

| **Analyte** | **Method** |
| --- | --- |
| **Sodium** | ISE, indirect measurement |
| **Potassium** | ISE, indirect measurement |
| **Chloride** | ISE, indirect measurement |
| **Calcium** | Photometric, NM-BAPTA (centers J, M: o-cresolphthalein complexone) |
| **Magnesium** | Xylidyle blue (center M: methylthymol blue) |
| **Anorganic phosphorus** | Ammonium-Phosphomolybdat-complex, UV |
| **AST** | IFCC-37°C |
| **ALT** | IFCC-37°C |
| **Alkaline Phosphatase** | IFCC-method |
| **LDH** | IFCC-37°C |
| **γ-GT** | IFCC-37°C |
| **Creatinine** | Enzymatic (center D: Jaffé with reflex testing using enzymatic assay in case of interference) |
| **Urea** | Enzymatic UV-test (urease/GLDH) |
| **Total protein** | Biuret |
| **Albumin** | Bromcresol green (center M: Bromcresol purple) |

Analytical methods are not listed if they were excluded from the analysis, see Methods. AST, aspartate transaminase; ALT, alanine transaminase; LDH, lactate dehydrogenase; y-GT, γ-glutamyltransferase.

# Supplemental Table 3 Comparability of test results across centers.

|  | **Age** | **Sex** | **CVbetween-center Medians** | | | | | | | | | | | | | | |
| --- | --- | --- | --- | --- | --- | --- | --- | --- | --- | --- | --- | --- | --- | --- | --- | --- | --- |
|  | **Na+** | **K+** | **Cl-** | **Ca2+** | **Mg2+** | **Ph-** | **AST** | **ALT** | **aP** | **γ-GT** | **LDH** | **Crea** | **Urea** | **Prot** | **Alb** |
|  | 1-2 | Boys | 0,8% | 4,0% | 0,8% | 1,1% | 2,0% | 2,7% | 5,0% | 7,0% | 4,4% | 11,4% | 5,0% | 5,2% | 5,5% | 2,1% | 1,9% |
|  | Girls | 0,7% | 3,9% | 0,9% | 1,3% | 1,7% | 3,5% | 5,0% | 8,1% | 4,6% | 11,7% | 5,3% | 5,3% | 6,1% | 2,3% | 1,4% |
|  | 2-3 | Boys | 0,7% | 3,9% | 0,6% | 1,2% | 3,0% | 1,7% | 4,8% | 7,8% | 3,4% | 10,4% | 5,3% | 3,3% | 5,2% | 1,9% | 1,7% |
|  | Girls | 0,7% | 3,8% | 0,8% | 1,2% | 2,7% | 2,3% | 4,6% | 6,5% | 4,7% | 11,3% | 5,1% | 3,1% | 5,3% | 1,8% | 2,3% |
|  | 3-4 | Boys | 0,7% | 4,5% | 0,7% | 1,2% | 1,8% | 2,5% | 5,3% | 8,7% | 6,0% | 10,2% | 4,9% | 4,1% | 4,9% | 1,9% | 1,9% |
|  | Girls | 0,5% | 3,8% | 1,2% | 1,2% | 2,3% | 3,1% | 5,2% | 9,1% | 4,6% | 11,4% | 5,3% | 3,5% | 4,4% | 2,2% | 0,9% |
|  | 4-5 | Boys | 0,7% | 3,3% | 0,9% | 1,3% | 1,9% | 2,2% | 5,2% | 8,3% | 3,5% | 11,0% | 4,3% | 3,9% | 3,6% | 1,7% | 1,7% |
|  | Girls | 0,6% | 4,2% | 0,8% | 1,3% | 1,6% | 3,2% | 5,4% | 8,6% | 5,3% | 9,4% | 4,7% | 4,1% | 5,4% | 2,0% | 1,8% |
|  | 5-6 | Boys | 0,5% | 3,8% | 0,8% | 1,2% | 2,1% | 3,1% | 5,4% | 7,3% | 4,3% | 10,3% | 5,1% | 3,1% | 2,9% | 1,5% | 1,8% |
|  | Girls | 0,5% | 4,1% | 1,0% | 1,3% | 2,3% | 2,6% | 5,2% | 9,1% | 4,2% | 9,8% | 4,6% | 3,4% | 3,7% | 1,7% | 1,3% |
|  | 6-7 | Boys | 0,4% | 3,7% | 1,0% | 1,3% | 1,4% | 3,1% | 5,6% | 8,3% | 4,0% | 8,2% | 5,1% | 3,1% | 2,9% | 1,5% | 1,7% |
|  | Girls | 0,5% | 4,1% | 0,7% | 1,3% | 2,0% | 2,3% | 6,6% | 8,0% | 4,4% | 9,8% | 5,5% | 2,8% | 3,5% | 1,5% | 2,0% |
|  | 7-8 | Boys | 0,4% | 4,1% | 0,9% | 1,0% | 1,3% | 3,3% | 5,3% | 7,6% | 3,8% | 10,5% | 5,2% | 4,2% | 4,1% | 1,3% | 1,7% |
|  | Girls | 0,6% | 3,9% | 0,7% | 1,2% | 2,0% | 3,1% | 5,9% | 6,7% | 3,5% | 11,3% | 5,2% | 3,1% | 3,4% | 2,1% | 1,7% |
|  | 8-9 | Boys | 0,6% | 4,4% | 0,6% | 1,1% | 1,8% | 3,1% | 6,1% | 7,2% | 2,9% | 7,7% | 5,3% | 3,6% | 4,2% | 2,0% | 2,2% |
|  | Girls | 0,6% | 3,7% | 0,7% | 1,2% | 1,9% | 2,5% | 6,1% | 7,6% | 5,0% | 10,2% | 5,0% | 3,1% | 4,2% | 1,9% | 1,4% |
|  | 9-10 | Boys | 0,5% | 4,1% | 0,5% | 1,3% | 1,5% | 2,5% | 6,3% | 7,5% | 3,6% | 7,9% | 4,8% | 3,4% | 3,5% | 1,8% | 1,8% |
|  | Girls | 0,6% | 3,7% | 0,7% | 1,4% | 2,2% | 3,2% | 6,9% | 7,8% | 4,8% | 10,0% | 5,0% | 4,0% | 2,5% | 1,5% | 1,4% |
|  | 10-11 | Boys | 0,6% | 3,7% | 0,7% | 1,2% | 2,1% | 3,0% | 5,9% | 6,4% | 4,6% | 10,3% | 4,5% | 3,3% | 3,9% | 1,2% | 0,9% |
|  | Girls | 0,4% | 3,5% | 0,7% | 1,3% | 1,8% | 2,8% | 6,3% | 9,6% | 4,7% | 8,6% | 5,7% | 3,1% | 4,6% | 1,7% | 1,4% |
|  | 11-12 | Boys | 0,6% | 3,9% | 0,8% | 1,2% | 2,0% | 3,4% | 6,0% | 7,4% | 6,9% | 8,2% | 4,2% | 4,0% | 3,3% | 1,7% | 2,2% |
|  | Girls | 0,4% | 4,3% | 0,6% | 1,1% | 1,2% | 3,2% | 7,0% | 7,6% | 3,8% | 11,2% | 4,9% | 2,8% | 4,4% | 1,4% | 1,6% |
|  | 12-13 | Boys | 0,7% | 3,9% | 0,7% | 1,3% | 1,6% | 2,9% | 6,7% | 8,3% | 6,4% | 8,7% | 4,7% | 4,4% | 2,7% | 1,7% | 1,6% |
|  | Girls | 0,5% | 3,5% | 0,7% | 1,2% | 1,5% | 2,4% | 6,0% | 7,7% | 3,1% | 11,1% | 5,1% | 3,9% | 3,6% | 2,2% | 1,1% |
|  | 13-14 | Boys | 0,6% | 3,9% | 0,6% | 1,2% | 1,4% | 2,7% | 6,7% | 7,5% | 7,9% | 10,3% | 4,6% | 4,0% | 3,5% | 2,1% | 1,9% |
|  | Girls | 0,6% | 3,6% | 0,7% | 1,3% | 1,6% | 3,1% | 7,0% | 6,6% | 6,1% | 7,9% | 5,7% | 4,4% | 2,5% | 1,9% | 2,4% |
|  | 14-15 | Boys | 0,6% | 3,7% | 0,7% | 1,2% | 1,6% | 2,9% | 6,8% | 7,5% | 4,2% | 8,3% | 5,2% | 5,1% | 3,3% | 2,2% | 1,5% |
|  | Girls | 0,5% | 3,7% | 0,6% | 1,3% | 1,7% | 3,7% | 7,4% | 8,9% | 4,4% | 10,1% | 5,9% | 4,5% | 2,5% | 1,9% | 1,5% |
|  | 15-16 | Boys | 0,7% | 3,7% | 0,7% | 1,7% | 1,3% | 3,3% | 7,6% | 8,1% | 6,0% | 6,2% | 5,2% | 4,4% | 3,6% | 2,1% | 2,4% |
|  | Girls | 0,5% | 3,8% | 0,6% | 1,5% | 1,3% | 3,9% | 8,2% | 8,2% | 3,6% | 8,9% | 5,5% | 4,1% | 3,8% | 2,1% | 2,0% |
|  | 16-17 | Boys | 0,6% | 4,8% | 0,8% | 1,6% | 1,6% | 2,4% | 8,1% | 7,2% | 3,9% | 6,5% | 7,1% | 3,5% | 2,8% | 2,0% | 2,6% |
|  | Girls | 0,6% | 4,3% | 0,6% | 1,3% | 1,4% | 3,6% | 7,6% | 8,4% | 3,8% | 9,8% | 7,0% | 4,1% | 4,0% | 2,5% | 1,5% |
|  | 17-18 | Boys | 0,6% | 4,5% | 0,9% | 1,6% | 1,2% | 4,7% | 8,6% | 7,2% | 6,3% | 8,3% | 6,7% | 4,3% | 3,6% | 2,1% | 2,0% |
|  | Girls | 0,7% | 4,5% | 0,6% | 1,4% | 1,2% | 3,1% | 7,1% | 7,6% | 4,1% | 8,8% | 6,8% | 4,1% | 4,0% | 2,3% | 2,6% |
|  | 18-19 | Boys | 0,7% | 4,6% | 0,8% | 0,9% | 1,0% | 1,5% | 8,4% | 6,8% | 3,0% | 6,5% | 7,0% | 5,2% | 4,6% | 1,8% | 1,6% |
|  | Girls | 0,4% | 4,4% | 0,7% | 1,2% | 1,2% | 3,4% | 8,8% | 7,1% | 2,9% | 3,7% | 5,4% | 4,2% | 4,7% | 1,9% | 2,4% |
| EFLM | Total Error (Minimum) | | 1.0% | 7.3% | 2.0% | N/A | N/A | N/A | 20.5% | 24.1% | 15.9% | 28.3% | 11.5% | 11.2% | 26.6% | 5.2% | 3.9% |
| Total Error (Desirable) | | 0.7% | 4.8% | 1.3% | 13.6% | 16.1% | 10.6% | 18.9% | 7.7% | 7.5% | 17.8% | 3.5% | 2.6% |
| RCV 95% | | 1.4% | 11.4% | 3.0% | 26.6% | 28.0% | 14.7% | 25.2% | 14.4% | 12.5% | 38.5% | 7.2% | 3.9% |
| Ricós et al. / Westgard | Imprecision | | 3,2% | 0,9% | 6,8% | 0,6% | 1,1% | 2,8% | 4,1% | 6,2% | 9,7% | 6,7% | 4,3% | 1,6% | 3,0% | 6,1% | 1,4% |
| Bias | | 6,7% | 3,1% | 4,8% | 0,5% | 0,8% | 3,2% | 3,4% | 6,5% | 11,5% | 11,1% | 4,3% | 1,4% | 4,0% | 5,6% | 1,4% |
| Total error | | 12,0% | 4,6% | 16,0% | 1,5% | 2,6% | 7,8% | 10,1% | 16,7% | 27,5% | 22,1% | 11,4% | 4,1% | 8,9% | 15,6% | 3,6% |

CV(between-center Medians) denotes the CV of all centers’ medians. Total Error and RCV 95% (reference change value, α=95 %) denote the respective values from the *EFLM Biological Variation Database* specifications available at https://biologicalvariation.eu/. Imprecision, Bias, and Total Error denote the respective values from the *Desirable Biological Variation Database* specifications based on data by Ricós et al. [15] and available at <https://www.westgard.com/biodatabase1.htm>. See Supplemental Figure 1 for single centers’ data.

Na+, sodium; K+, potassium; Cl-, chloride; Ca2+, calcium; Mg2+, magnesium; Ph-, phosphate; AST, aspartate transaminase; ALT, alanine transaminase; aP, alkaline phosphatase; y-GT, γ-glutamyltransferase; LDH, lactate dehydrogenase; Crea, creatinine; Prot, total protein; Alb, albumin; EFLM, European Federation of Clinical Chemistry and Laboratory Medicine.

# Supplemental Table 4 Median test results over time.

|  | **Na+** | **K+** | **Cl-** | **Ca2+** | **Mg2+** | **Ph-** | **AST** | **ALT** | **aP** | **γ-GT** | **LDH** | **Crea** | **Urea** | **Prot** | **Alb** |
| --- | --- | --- | --- | --- | --- | --- | --- | --- | --- | --- | --- | --- | --- | --- | --- |
| 2008/1 | 138 | 4,2 | 101 | 2,42 | 0,87 | 1,48 | 29,5 |  |  | 16 | 212,5 |  | 25 | 70 |  |
| 2008/2 | 138 | 4,1 | 102 | 2,32 | 0,85 | 1,4 | 28 | 17 | 206 | 14 | 224 | 0,48 | 25 | 73 | 43 |
| 2008/3 | 138 | 4 | 102 | 2,36 | 0,85 | 1,39 | 28 | 17 | 209 | 15 | 220 | 0,48 | 25 | 74 | 43 |
| 2008/4 | 139 | 4,1 | 102 | 2,31 | 0,84 | 1,38 | 27 | 15 | 205 | 15 | 211,5 | 0,46 | 24 | 75 | 42 |
| 2009/1 | 138 | 4,1 | 101 | 2,35 | 0,86 | 1,41 | 30 | 16 | 192 | 16 | 214 | 0,46 | 25 | 74 | 43 |
| 2009/2 | 138 | 4,1 | 101 | 2,35 | 0,85 | 1,46 | 29 | 16 | 208 | 14 | 222 | 0,5 | 23 | 74 | 45 |
| 2009/3 | 139 | 4,1 | 101,5 | 2,33 | 0,86 | 1,4 | 29 | 16 | 202,5 | 14 | 213 | 0,47 | 24 | 72 | 43 |
| 2009/4 | 138 | 4,1 | 101 | 2,32 | 0,82 | 1,42 | 29 | 16 | 202 | 14 | 224 | 0,44 | 22 | 71 | 43 |
| 2010/1 | 139 | 4,1 | 103 | 2,35 | 0,85 | 1,42 | 30 | 17 | 180 | 14 | 221 | 0,47 | 24 | 70 | 46 |
| 2010/2 | 138 | 4,1 | 103 | 2,36 | 0,85 | 1,44 | 31 | 18 | 189 | 14 | 228 | 0,47 | 24 | 69,5 | 45 |
| 2010/3 | 139 | 4,1 | 103 | 2,38 | 0,83 | 1,44 | 31 | 17 | 184 | 14 | 227 | 0,48 | 24 | 70 | 45 |
| 2010/4 | 139 | 4,1 | 103 | 2,38 | 0,84 | 1,44 | 30 | 16 | 189,5 | 14 | 227 | 0,47 | 25 | 71 | 46 |
| 2011/1 | 138 | 4 | 103 | 2,37 | 0,84 | 1,41 | 31 | 17 | 192 | 14 | 226 | 0,47 | 25 | 71 | 45 |
| 2011/2 | 139 | 4 | 103 | 2,4 | 0,85 | 1,44 | 31 | 17 | 195 | 13 | 234 | 0,47 | 25 | 70 | 45 |
| 2011/3 | 139 | 4 | 103 | 2,39 | 0,84 | 1,41 | 30 | 17 | 195 | 13 | 226 | 0,5 | 24 | 69 | 45 |
| 2011/4 | 139 | 4 | 102 | 2,38 | 0,83 | 1,4 | 30 | 16 | 189 | 13 | 221 | 0,46 | 24 | 70 | 45 |
| 2012/1 | 139 | 4,1 | 102 | 2,39 | 0,85 | 1,42 | 26 | 15 | 192 | 12 | 220 | 0,44 | 24 | 70 | 46 |
| 2012/2 | 139 | 4 | 102 | 2,39 | 0,84 | 1,42 | 26 | 15 | 193 | 12 | 224 | 0,49 | 24,5 | 70 | 46 |
| 2012/3 | 139 | 4,1 | 102 | 2,4 | 0,84 | 1,43 | 26 | 15 | 193 | 13 | 228 | 0,49 | 24 | 70 | 46 |
| 2012/4 | 139 | 4,1 | 101 | 2,4 | 0,86 | 1,43 | 26 | 15 | 196 | 12 | 221 | 0,49 | 24 | 71 | 46 |
| 2013/1 | 139 | 4,1 | 102 | 2,37 | 0,84 | 1,4 | 27 | 15 | 185 | 12 | 224 | 0,46 | 24 | 71 | 46 |
| 2013/2 | 139 | 4,1 | 102 | 2,39 | 0,85 | 1,4 | 27 | 15 | 187 | 12 | 230 | 0,47 | 24 | 70 | 46 |
| 2013/3 | 139 | 4,1 | 102 | 2,39 | 0,84 | 1,42 | 27 | 15 | 194 | 12 | 230 | 0,48 | 24 | 70 | 45 |
| 2013/4 | 139 | 4,1 | 102 | 2,41 | 0,85 | 1,42 | 26 | 15 | 189 | 12 | 227 | 0,495 | 23 | 70 | 45 |
| 2014/1 | 139 | 4,1 | 102 | 2,39 | 0,86 | 1,42 | 26 | 16 | 186 | 12 | 227 | 0,45 | 24 | 70 | 45 |
| 2014/2 | 139 | 4,1 | 102 | 2,4 | 0,86 | 1,43 | 27 | 16 | 196 | 12 | 230 | 0,47 | 24 | 70 | 45 |
| 2014/3 | 139 | 4,1 | 102 | 2,41 | 0,86 | 1,41 | 27 | 15 | 194 | 12 | 228 | 0,52 | 24 | 70 | 46 |
| 2014/4 | 140 | 4,1 | 102 | 2,41 | 0,86 | 1,41 | 26 | 15 | 187 | 12 | 226 | 0,52 | 23 | 70 | 46 |
| 2015/1 | 140 | 4,1 | 102 | 2,42 | 0,865 | 1,39 | 26 | 17 | 179 | 13 | 226 | 0,56 | 24 | 71 | 45 |
| 2015/2 | 140 | 4,1 | 102 | 2,42 | 0,86 | 1,39 | 27 | 17 | 189 | 13 | 229 | 0,57 | 24 | 71 | 45 |
| 2015/3 | 140 | 4,1 | 102 | 2,42 | 0,86 | 1,4 | 27 | 16 | 187 | 13 | 231 | 0,58 | 24 | 71 | 45 |
| 2015/4 | 140 | 4,1 | 102 | 2,42 | 0,855 | 1,39 | 26 | 16 | 184 | 13 | 225 | 0,58 | 24 | 71 | 45 |
| 2016/1 | 140 | 4,1 | 101 | 2,41 | 0,86 | 1,39 | 26 | 17 | 183 | 13 | 224 | 0,55 | 24 | 71 | 45 |
| 2016/2 | 140 | 4,1 | 102 | 2,42 | 0,86 | 1,39 | 26 | 17 | 191 | 13 | 232 | 0,56 | 24 | 70 | 46 |
| 2016/3 | 140 | 4,1 | 102 | 2,42 | 0,85 | 1,39 | 27 | 17 | 186 | 13 | 234 | 0,57 | 24 | 71 | 46 |
| 2016/4 | 140 | 4,1 | 101 | 2,42 | 0,86 | 1,39 | 26 | 16 | 183 | 13 | 227 | 0,55 | 24 | 71 | 46 |
| 2017/1 | 140 | 4,1 | 101 | 2,42 | 0,86 | 1,4 | 26 | 17 | 183 | 13 | 231 | 0,54 | 24 | 72 | 46 |
| 2017/2 | 140 | 4,1 | 101 | 2,42 | 0,85 | 1,42 | 26 | 16 | 189 | 12 | 237 | 0,54 | 24 | 72 | 46 |
| 2017/3 | 140 | 4,1 | 102 | 2,42 | 0,85 | 1,45 | 25 | 15 | 191 | 13 | 231 | 0,52 | 24 | 71 | 45 |
| 2017/4 | 139 | 4,3 | 102 | 2,35 | 0,86 | 1,5 | 26 | 17 | 201,5 | 13 | 230 | 0,48 | 24 | 71 | 44 |
| CV | 0,5% | 1,3% | 0,6% | 1,3% | 1,3% | 1,8% | 6,6% | 5,4% | 3,9% | 8,1% | 2,6% | 8,2% | 2,5% | 1,9% | 2,4% |
| Total Error (Minimum) | 0,7% | 4,8% | 1,3% |  |  |  | 13,6% | 16,1% | 10,6% | 18,9% | 7,7% | 7,5% | 17,8% | 3,5% | 2,6% |
| Total Error (Desirable) | 1,0% | 7,3% | 2,0% | 20,5% | 24,1% | 15,9% | 28,3% | 11,5% | 11,2% | 26,6% | 5,2% | 3,9% |
| RCV 95% | 1,4% | 11,4% | 3,0% | 26,6% | 28,0% | 14,7% | 25,2% | 14,4% | 12,5% | 38,5% | 7,2% | 3,9% |
| Ricós Total Error | 12,0% | 4,6% | 16,0% | 1,5% | 2,6% | 7,8% | 10,1% | 16,7% | 27,5% | 22,1% | 11,4% | 4,1% | 8,9% | 15,6% | 3,6% |

Absolute median values for each analyte and quarter and CV of quarterly medians. Total Error and RCV 95% (reference change value, α=95 %) denote the respective values from the *EFLM Biological Variation Database* specifications available at https://biologicalvariation.eu/. Ricós Total Error denotes the respective value from the *Desirable Biological Variation Database* specifications based on data by Ricós et al. [15] and available at <https://www.westgard.com/biodatabase1.htm>. Na+, sodium; K+, potassium; Cl-, chloride; Ca2+, calcium; Mg2+, magnesium; Ph-, phosphate; AST, aspartate transaminase; ALT, alanine transaminase; aP, alkaline phosphatase; y-GT, γ-glutamyltransferase; LDH, lactate dehydrogenase; Crea, creatinine; Prot, total protein; Alb, albumin; EFLM, European Federation of Clinical Chemistry and Laboratory Medicine.

# Supplemental Table 5 Reported reference intervals’ fractional polynomials.

| **Analyte** | **Sex** | **Percentile** | **Fractional Polynomial** |
| --- | --- | --- | --- |
| **Na+** | Boys | 2.5th | -5.466900E-03 × log(x+2)⁵ + 1.572536E-01 × log(x+2)⁴ + -1.681973E+00 × log(x+2)³ + 8.549127E+00 × log(x+2)² + -2.213044E+01 × log(x+2)¹ + 1.631409E+02 + 8.549127E+00 × log(x+2)⁻¹ + -2.213044E+01 × log(x+2)⁻² |
| 97.5th | -1.529910E-02 × log(x+2)⁵ + 5.240326E-01 × log(x+2)⁴ + -7.030774E+00 × log(x+2)³ + 4.704958E+01 × log(x+2)² + -1.647022E+02 × log(x+2)¹ + 4.299347E+02 + 4.704958E+01 × log(x+2)⁻¹ + -1.647022E+02 × log(x+2)⁻² |
| Girls | 2.5th | -3.607123E-02 × log(x+2)⁵ + 1.095962E+00 × log(x+2)⁴ + -1.317952E+01 × log(x+2)³ + 8.032934E+01 × log(x+2)² + -2.639971E+02 × log(x+2)¹ + 5.926697E+02 + 8.032934E+01 × log(x+2)⁻¹ + -2.639971E+02 × log(x+2)⁻² |
| 97.5th | -1.734937E-02 × log(x+2)⁵ + 5.570149E-01 × log(x+2)⁴ + -7.104185E+00 × log(x+2)³ + 4.568977E+01 × log(x+2)² + -1.545218E+02 × log(x+2)¹ + 4.018736E+02 + 4.568977E+01 × log(x+2)⁻¹ + -1.545218E+02 × log(x+2)⁻² |
| **K+** | Boys | 2.5th | -2.210687E-03 × log(x+2)⁵ + 5.861890E-02 × log(x+2)⁴ + -5.734904E-01 × log(x+2)³ + 2.504300E+00 × log(x+2)² + -4.770076E+00 × log(x+2)¹ + 7.471546E+00 + -5.734904E-01 × log(x+2)⁻¹ |
| 97.5th | -2.581843E-04 × log(x+2)⁵ + 5.806790E-03 × log(x+2)⁴ + -2.030765E-02 × log(x+2)³ + -3.093769E-01 × log(x+2)² + 2.242748E+00 × log(x+2)¹ + 1.242464E+00 + -2.030765E-02 × log(x+2)⁻¹ |
| Girls | 2.5th | -2.760320E-03 × log(x+2)⁵ + 7.461104E-02 × log(x+2)⁴ + -7.549238E-01 × log(x+2)³ + 3.517520E+00 × log(x+2)² + -7.639790E+00 × log(x+2)¹ + 1.119239E+01 + -7.549238E-01 × log(x+2)⁻¹ |
| 97.5th | 4.478865E-04 × log(x+2)⁵ + -1.646007E-02 × log(x+2)⁴ + 2.505910E-01 × log(x+2)³ + -1.908687E+00 × log(x+2)² + 6.899537E+00 × log(x+2)¹ + -4.704962E+00 + 2.505910E-01 × log(x+2)⁻¹ |
| **Cl-** | Boys | 2.5th | -4.336209E-02 × log(x+2)⁴ + 1.085150E+00 × log(x+2)³ + -9.775667E+00 × log(x+2)² + 3.761112E+01 × log(x+2)¹ + 4.016699E+01 + -9.775667E+00 × log(x+2)⁻¹ |
| 97.5th | 8.692442E-03 × log(x+2)⁴ + -2.636235E-01 × log(x+2)³ + 2.822761E+00 × log(x+2)² + -1.303864E+01 × log(x+2)¹ + 1.297021E+02 + 2.822761E+00 × log(x+2)⁻¹ |
| Girls | 2.5th | -3.448300E-02 × log(x+2)⁴ + 9.203049E-01 × log(x+2)³ + -8.665922E+00 × log(x+2)² + 3.413262E+01 × log(x+2)¹ + 4.543635E+01 + -8.665922E+00 × log(x+2)⁻¹ |
| 97.5th | 6.925164E-02 × log(x+2)⁴ + -1.698317E+00 × log(x+2)³ + 1.515171E+01 × log(x+2)² + -5.937502E+01 × log(x+2)¹ + 2.022397E+02 + 1.515171E+01 × log(x+2)⁻¹ |
| **Ca2+** | Boys | 2.5th | 2.861807E-05 × log(x+2)⁷ + -9.512163E-04 × log(x+2)⁶ + 1.249006E-02 × log(x+2)⁵ + -8.198761E-02 × log(x+2)⁴ + 2.851175E-01 × log(x+2)³ + -5.567311E-01 × log(x+2)² + 7.776306E-01 × log(x+2)¹ + 1.544215E+00 |
| 97.5th | -7.289020E-05 × log(x+2)⁷ + 2.372796E-03 × log(x+2)⁶ + -3.076438E-02 × log(x+2)⁵ + 2.026860E-01 × log(x+2)⁴ + -7.159583E-01 × log(x+2)³ + 1.293251E+00 × log(x+2)² + -9.682648E-01 × log(x+2)¹ + 2.833021E+00 |
| Girls | 2.5th | 1.961702E-05 × log(x+2)⁷ + -8.305845E-04 × log(x+2)⁶ + 1.376111E-02 × log(x+2)⁵ + -1.152910E-01 × log(x+2)⁴ + 5.262677E-01 × log(x+2)³ + -1.331258E+00 × log(x+2)² + 1.851757E+00 × log(x+2)¹ + 1.080736E+00 |
| 97.5th | 2.323471E-05 × log(x+2)⁷ + -9.495143E-04 × log(x+2)⁶ + 1.559355E-02 × log(x+2)⁵ + -1.317453E-01 × log(x+2)⁴ + 6.090171E-01 × log(x+2)³ + -1.519977E+00 × log(x+2)² + 1.875104E+00 × log(x+2)¹ + 1.886082E+00 |
| **Mg2+** | Boys | 2.5th | -6.289770E-04 × log(x+2)⁵ + 1.816650E-02 × log(x+2)⁴ + -2.010771E-01 × log(x+2)³ + 1.059944E+00 × log(x+2)² + -2.693445E+00 × log(x+2)¹ + 3.743622E+00 + -2.010771E-01 × log(x+2)⁻¹ |
| 97.5th | 2.050952E-04 × log(x+2)⁵ + -4.769223E-03 × log(x+2)⁴ + 3.975841E-02 × log(x+2)³ + -1.448281E-01 × log(x+2)² + 2.302315E-01 × log(x+2)¹ + 8.561713E-01 + 3.975841E-02 × log(x+2)⁻¹ |
| Girls | 2.5th | -6.714481E-04 × log(x+2)⁵ + 1.885974E-02 × log(x+2)⁴ + -2.021637E-01 × log(x+2)³ + 1.024027E+00 × log(x+2)² + -2.460533E+00 × log(x+2)¹ + 3.259975E+00 + -2.021637E-01 × log(x+2)⁻¹ |
| 97.5th | 9.382911E-05 × log(x+2)⁵ + -9.655676E-04 × log(x+2)⁴ + -1.028334E-02 × log(x+2)³ + 1.694754E-01 × log(x+2)² + -7.260755E-01 × log(x+2)¹ + 2.127922E+00 + -1.028334E-02 × log(x+2)⁻¹ |
| **Ph-** | Boys | 2.5th | -2.982412E-05 × log(x+2)⁷ + 1.046264E-03 × log(x+2)⁶ + -1.669180E-02 × log(x+2)⁵ + 1.538100E-01 × log(x+2)⁴ + -8.348750E-01 × log(x+2)³ + 2.454100E+00 × log(x+2)² + -3.248350E+00 × log(x+2)¹ + 2.787172E+00 |
| 97.5th | -2.388961E-04 × log(x+2)⁷ + 8.122822E-03 × log(x+2)⁶ + -1.122513E-01 × log(x+2)⁵ + 8.086037E-01 × log(x+2)⁴ + -3.229391E+00 × log(x+2)³ + 6.976122E+00 × log(x+2)² + -7.338228E+00 × log(x+2)¹ + 5.373448E+00 |
| Girls | 2.5th | 6.812996E-05 × log(x+2)⁷ + -2.495246E-03 × log(x+2)⁶ + 3.601563E-02 × log(x+2)⁵ + -2.615195E-01 × log(x+2)⁴ + 1.013855E+00 × log(x+2)³ + -2.101316E+00 × log(x+2)² + 2.298180E+00 × log(x+2)¹ + 4.370886E-01 |
| 97.5th | -7.829363E-05 × log(x+2)⁷ + 2.286711E-03 × log(x+2)⁶ + -2.576784E-02 × log(x+2)⁵ + 1.381980E-01 × log(x+2)⁴ + -3.367763E-01 × log(x+2)³ + 1.808197E-01 × log(x+2)² + 4.283325E-01 × log(x+2)¹ + 2.271395E+00 |
| **AST** | Boys | 2.5th | -3.496102E-02 × log(x+2)⁵ + 1.087389E+00 × log(x+2)⁴ + -1.326796E+01 × log(x+2)³ + 7.839206E+01 × log(x+2)² + -2.249077E+02 × log(x+2)¹ + 2.991621E+02 + -1.326796E+01 × log(x+2)⁻¹ |
| 97.5th | -8.520642E-02 × log(x+2)⁵ + 2.759923E+00 × log(x+2)⁴ + -3.434506E+01 × log(x+2)³ + 2.036273E+02 × log(x+2)² + -5.819611E+02 × log(x+2)¹ + 7.636933E+02 + -3.434506E+01 × log(x+2)⁻¹ |
| Girls | 2.5th | -3.768769E-02 × log(x+2)⁵ + 1.166509E+00 × log(x+2)⁴ + -1.428234E+01 × log(x+2)³ + 8.543429E+01 × log(x+2)² + -2.508139E+02 × log(x+2)¹ + 3.436192E+02 + -1.428234E+01 × log(x+2)⁻¹ |
| 97.5th | -5.567429E-02 × log(x+2)⁵ + 1.824311E+00 × log(x+2)⁴ + -2.283132E+01 × log(x+2)³ + 1.347191E+02 × log(x+2)² + -3.796924E+02 × log(x+2)¹ + 5.104127E+02 + -2.283132E+01 × log(x+2)⁻¹ |
| **ALT** | Boys | 2.5th | 3.003289E-15 × (x+100)⁴ + 4.995707E-11 × (x+100)³ + -9.275093E-07 × (x+100)² + 4.176859E-03 × (x+100)¹ + 1.977716E+00 + 4.176859E-03 × (x+100)⁻¹ + 1.977716E+00 × (x+100)⁻² |
| 97.5th | 3.327182E-14 × (x+100)⁴ + -3.798998E-10 × (x+100)³ + 8.104373E-07 × (x+100)² + 5.488685E-03 × (x+100)¹ + 4.060696E+00 + 5.488685E-03 × (x+100)⁻¹ + 4.060696E+00 × (x+100)⁻² |
| Girls | 2.5th | 3.474901E-14 × (x+100)⁴ + -4.958705E-10 × (x+100)³ + 2.212358E-06 × (x+100)² + -3.304234E-03 × (x+100)¹ + 9.154869E+00 + -3.304234E-03 × (x+100)⁻¹ + 9.154869E+00 × (x+100)⁻² |
| 97.5th | 5.369642E-15 × (x+100)⁴ + 3.396878E-10 × (x+100)³ + -5.062514E-06 × (x+100)² + 2.258300E-02 × (x+100)¹ + -1.386523E+01 + 2.258300E-02 × (x+100)⁻¹ + -1.386523E+01 × (x+100)⁻² |
| **aP** | Boys | 2.5th | -3.620156E-20 × (x+100)⁶ + 1.341838E-15 × (x+100)⁵ + -1.661066E-11 × (x+100)⁴ + 9.210268E-08 × (x+100)³ + -2.497292E-04 × (x+100)² + 3.389191E-01 × (x+100)¹ + -9.551326E+01 + 9.210268E-08 × (x+100)⁻¹ + -2.497292E-04 × (x+100)⁻² |
| 97.5th | 7.402425E-19 × (x+100)⁶ + -1.526194E-14 × (x+100)⁵ + 1.175098E-10 × (x+100)⁴ + -4.196572E-07 × (x+100)³ + 6.905870E-04 × (x+100)² + -3.812376E-01 × (x+100)¹ + 1.632102E+02 + -4.196572E-07 × (x+100)⁻¹ + 6.905870E-04 × (x+100)⁻² |
| Girls | 2.5th | -2.058591E-19 × (x+100)⁶ + 4.622112E-15 × (x+100)⁵ + -3.907476E-11 × (x+100)⁴ + 1.553694E-07 × (x+100)³ + -3.078833E-04 × (x+100)² + 3.193392E-01 × (x+100)¹ + -5.651997E+01 + 1.553694E-07 × (x+100)⁻¹ + -3.078833E-04 × (x+100)⁻² |
| 97.5th | -4.236768E-19 × (x+100)⁶ + 1.108686E-14 × (x+100)⁵ + -1.103230E-10 × (x+100)⁴ + 5.276242E-07 × (x+100)³ + -1.291016E-03 × (x+100)² + 1.648014E+00 × (x+100)¹ + -7.794730E+02 + 5.276242E-07 × (x+100)⁻¹ + -1.291016E-03 × (x+100)⁻² |
| **y-GT** | Boys | 2.5th | 2.559819E-02 × log(x+2)⁵ + -8.052516E-01 × log(x+2)⁴ + 9.559124E+00 × log(x+2)³ + -5.161319E+01 × log(x+2)² + 1.164240E+02 × log(x+2)¹ + -5.516207E+01 |
| 97.5th | 2.328517E-01 × log(x+2)⁵ + -6.835443E+00 × log(x+2)⁴ + 7.555986E+01 × log(x+2)³ + -3.746626E+02 × log(x+2)² + 7.226264E+02 × log(x+2)¹ + -1.044995E+02 |
| Girls | 2.5th | 9.702593E-03 × log(x+2)⁵ + -3.634597E-01 × log(x+2)⁴ + 4.785199E+00 × log(x+2)³ + -2.687611E+01 × log(x+2)² + 5.664209E+01 × log(x+2)¹ + -4.773611E+00 |
| 97.5th | 1.604953E-01 × log(x+2)⁵ + -4.946350E+00 × log(x+2)⁴ + 5.709555E+01 × log(x+2)³ + -2.935169E+02 × log(x+2)² + 5.793705E+02 × log(x+2)¹ + -6.478201E+01 |
| **LDH** | Boys | 2.5th | -1.506446E-01 × log(x+2)⁶ + 4.778181E+00 × log(x+2)⁵ + -6.023151E+01 × log(x+2)⁴ + 3.810933E+02 × log(x+2)³ + -1.256377E+03 × log(x+2)² + 2.024993E+03 × log(x+2)¹ + -1.145381E+03 + -6.023151E+01 × log(x+2)⁻¹ |
| 97.5th | -3.224887E-01 × log(x+2)⁶ + 1.054728E+01 × log(x+2)⁵ + -1.371752E+02 × log(x+2)⁴ + 8.981188E+02 × log(x+2)³ + -3.089220E+03 × log(x+2)² + 5.317352E+03 × log(x+2)¹ + -3.771752E+03 + -1.371752E+02 × log(x+2)⁻¹ |
| Girls | 2.5th | -1.705634E-02 × log(x+2)⁶ + 4.916030E-01 × log(x+2)⁵ + -5.312120E+00 × log(x+2)⁴ + 2.245187E+01 × log(x+2)³ + 7.253686E+00 × log(x+2)² + -3.181127E+02 × log(x+2)¹ + 9.164586E+02 + -5.312120E+00 × log(x+2)⁻¹ |
| 97.5th | 4.073791E-02 × log(x+2)⁶ + -1.817377E+00 × log(x+2)⁵ + 3.235564E+01 × log(x+2)⁴ + -2.991937E+02 × log(x+2)³ + 1.529706E+03 × log(x+2)² + -4.180702E+03 × log(x+2)¹ + 5.592973E+03 + 3.235564E+01 × log(x+2)⁻¹ |
| **Crea** | Boys | 2.5th | 2.017745E-04 × log(x+2)⁶ + -5.731068E-03 × log(x+2)⁵ + 6.449192E-02 × log(x+2)⁴ + -3.636973E-01 × log(x+2)³ + 1.082005E+00 × log(x+2)² + -1.662111E+00 × log(x+2)¹ + 1.318322E+00 |
| 97.5th | 4.077732E-04 × log(x+2)⁶ + -1.183998E-02 × log(x+2)⁵ + 1.364085E-01 × log(x+2)⁴ + -7.896426E-01 × log(x+2)³ + 2.420851E+00 × log(x+2)² + -3.852950E+00 × log(x+2)¹ + 3.105118E+00 |
| Girls | 2.5th | -7.773182E-05 × log(x+2)⁶ + 2.614689E-03 × log(x+2)⁵ + -3.356966E-02 × log(x+2)⁴ + 2.077335E-01 × log(x+2)³ + -6.200100E-01 × log(x+2)² + 7.080658E-01 × log(x+2)¹ + 1.782615E-01 |
| 97.5th | -8.473169E-05 × log(x+2)⁶ + 2.817104E-03 × log(x+2)⁵ + -3.556860E-02 × log(x+2)⁴ + 2.148700E-01 × log(x+2)³ + -5.995364E-01 × log(x+2)² + 4.454620E-01 × log(x+2)¹ + 9.589497E-01 |
| **Urea** | Boys | 2.5th | 3.401435E-03 × log(x+2)⁶ + -1.109747E-01 × log(x+2)⁵ + 1.396219E+00 × log(x+2)⁴ + -8.576735E+00 × log(x+2)³ + 2.702477E+01 × log(x+2)² + -4.035868E+01 × log(x+2)¹ + 2.572213E+01 |
| 97.5th | 7.530530E-03 × log(x+2)⁶ + -1.821004E-01 × log(x+2)⁵ + 1.498051E+00 × log(x+2)⁴ + -4.357489E+00 × log(x+2)³ + 1.333280E-01 × log(x+2)² + 1.095103E+01 × log(x+2)¹ + 3.005284E+01 |
| Girls | 2.5th | -1.753635E-03 × log(x+2)⁶ + 4.580783E-02 × log(x+2)⁵ + -4.780608E-01 × log(x+2)⁴ + 2.460864E+00 × log(x+2)³ + -5.647349E+00 × log(x+2)² + 3.077566E+00 × log(x+2)¹ + 8.420883E+00 |
| 97.5th | -3.731736E-03 × log(x+2)⁶ + 1.803011E-01 × log(x+2)⁵ + -3.091888E+00 × log(x+2)⁴ + 2.452992E+01 × log(x+2)³ + -9.349266E+01 × log(x+2)² + 1.552665E+02 × log(x+2)¹ + -4.954675E+01 |
| **Prot** | Boys | 2.5th | 1.119899E-02 × log(x+2)⁵ + -2.809659E-01 × log(x+2)⁴ + 2.448309E+00 × log(x+2)³ + -8.253738E+00 × log(x+2)² + 1.023707E+01 × log(x+2)¹ + 3.937438E+01 |
| 97.5th | -3.660604E-03 × log(x+2)⁵ + 2.005204E-01 × log(x+2)⁴ + -3.175452E+00 × log(x+2)³ + 2.074155E+01 × log(x+2)² + -5.373630E+01 × log(x+2)¹ + 1.029354E+02 |
| Girls | 2.5th | -3.446838E-03 × log(x+2)⁵ + 1.281431E-01 × log(x+2)⁴ + -1.903915E+00 × log(x+2)³ + 1.321843E+01 × log(x+2)² + -3.649857E+01 × log(x+2)¹ + 7.194350E+01 |
| 97.5th | -1.223772E-02 × log(x+2)⁵ + 3.532708E-01 × log(x+2)⁴ + -3.825692E+00 × log(x+2)³ + 1.924450E+01 × log(x+2)² + -4.166616E+01 × log(x+2)¹ + 9.234409E+01 |
| **Alb** | Boys | 2.5th | -4.941084E-03 × log(x+2)⁷ + 2.016825E-01 × log(x+2)⁶ + -3.416820E+00 × log(x+2)⁵ + 3.112538E+01 × log(x+2)⁴ + -1.655493E+02 × log(x+2)³ + 5.252636E+02 × log(x+2)² + -9.799236E+02 × log(x+2)¹ + 1.057426E+03 + 3.112538E+01 × log(x+2)⁻¹ + -1.655493E+02 × log(x+2)⁻² |
| 97.5th | -9.085080E-03 × log(x+2)⁷ + 3.544828E-01 × log(x+2)⁶ + -5.809075E+00 × log(x+2)⁵ + 5.224394E+01 × log(x+2)⁴ + -2.830199E+02 × log(x+2)³ + 9.530963E+02 × log(x+2)² + -1.976970E+03 × log(x+2)¹ + 2.444787E+03 + 5.224394E+01 × log(x+2)⁻¹ + -2.830199E+02 × log(x+2)⁻² |
| Girls | 2.5th | -5.981222E-03 × log(x+2)⁷ + 2.192934E-01 × log(x+2)⁶ + -3.268948E+00 × log(x+2)⁵ + 2.526921E+01 × log(x+2)⁴ + -1.063379E+02 × log(x+2)³ + 2.277914E+02 × log(x+2)² + -1.645991E+02 × log(x+2)¹ + -1.416366E+02 + 2.526921E+01 × log(x+2)⁻¹ + -1.063379E+02 × log(x+2)⁻² |
| 97.5th | 5.410911E-03 × log(x+2)⁷ + -2.102956E-01 × log(x+2)⁶ + 3.378071E+00 × log(x+2)⁵ + -2.889714E+01 × log(x+2)⁴ + 1.414631E+02 × log(x+2)³ + -3.975255E+02 × log(x+2)² + 6.177843E+02 × log(x+2)¹ + -4.517135E+02 + -2.889714E+01 × log(x+2)⁻¹ + 1.414631E+02 × log(x+2)⁻² |

These polynomials can be evaluated using x (age in days, day of birth = 0) as an input parameter and yield the corresponding reference limit. Na+, sodium; K+, potassium; Cl-, chloride; Ca2+, calcium; Mg2+, magnesium; Ph-, phosphate; AST, aspartate transaminase; ALT, alanine transaminase; aP, alkaline phosphatase; y-GT, γ-glutamyltransferase; LDH, lactate dehydrogenase; Crea, creatinine; Prot, total protein; Alb, albumin.

# Supplemental Figure 1


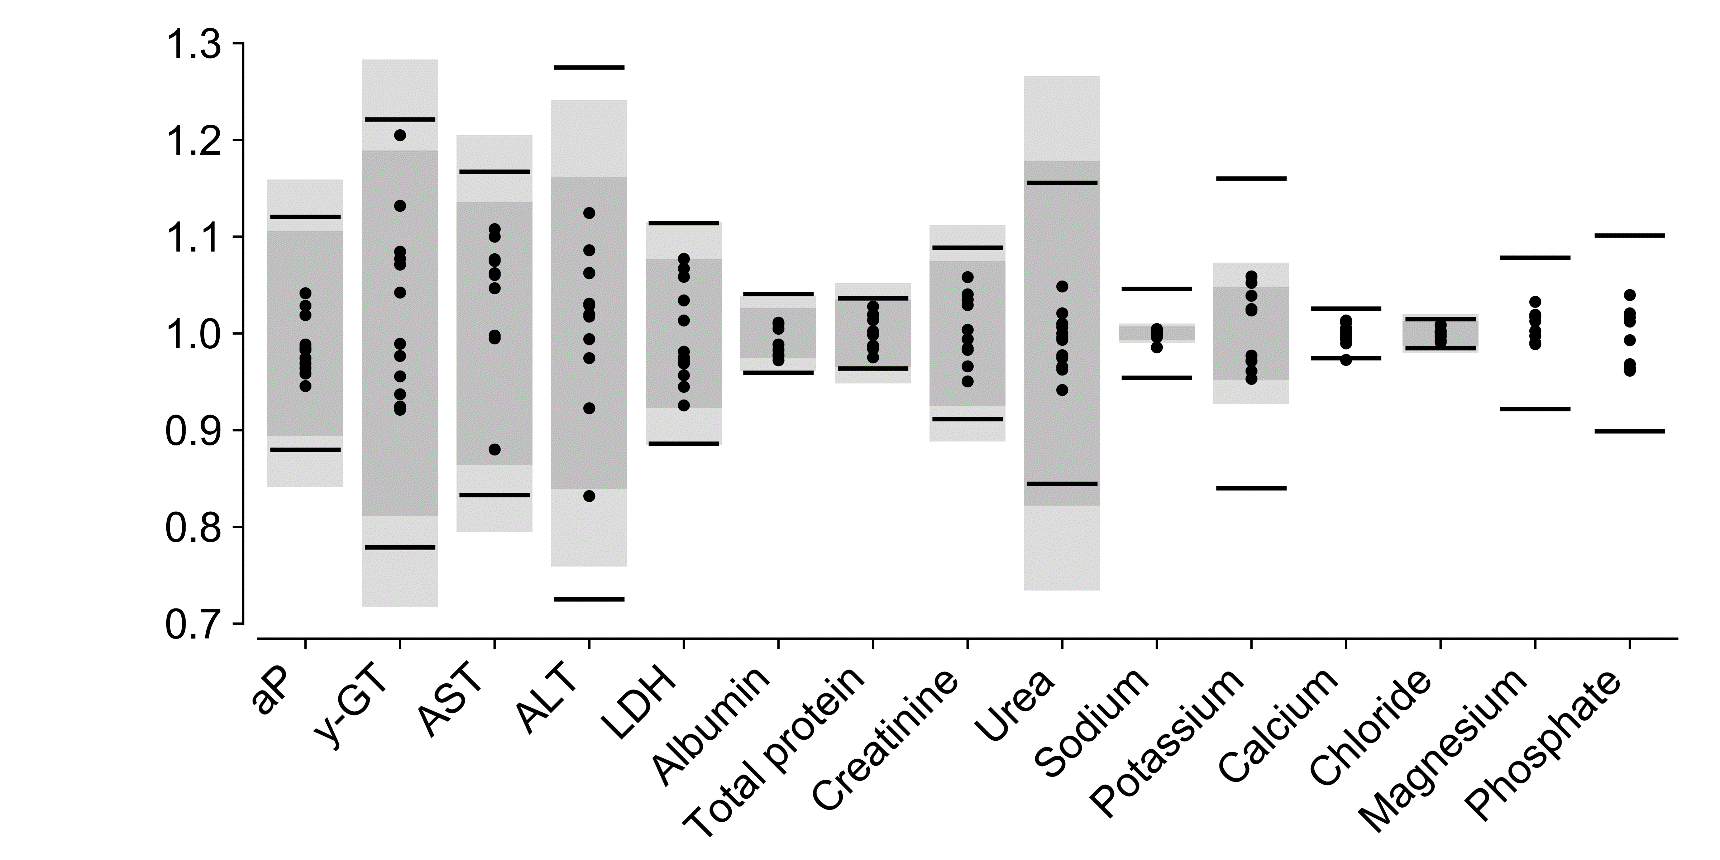


**Center-specific relative median values in comparison to the overall median and total error specifications.**

Center-specific medians of all analytes relative to the overall analyte median (= 1.0). Test results were adjusted for age and sex by stratification into sex-specific age groups (i.e. 1 to < 2 years, 2 to < 3 years, …, 17 to < 18 years, the first year of life was excluded) and division by the respective age- and sex-group’s all-center median before calculating the center-specific medians. Dark-gray bars denote the Desirable specification for Total Error, and light-gray bars denote the Minimum specification for Total Error according to the *EFLM Biological Variation Database* specifications available at https://biologicalvariation.eu/. Black bars denote the Total Error specification from the *Desirable Biological Variation Database* based on data by Ricós et al. [15] and available at <https://www.westgard.com/biodatabase1.htm>. See also Supplemental Table 2. aP: alkaline phosphatase, y-GT: gamma-glutamyltransferase, AST: aspartate transaminase, ALT: alanine transaminase, LDH: lactate dehydrogenase, EFLM: European Federation of Clinical Chemistry and Laboratory Medicine.

# Supplemental Figure 2


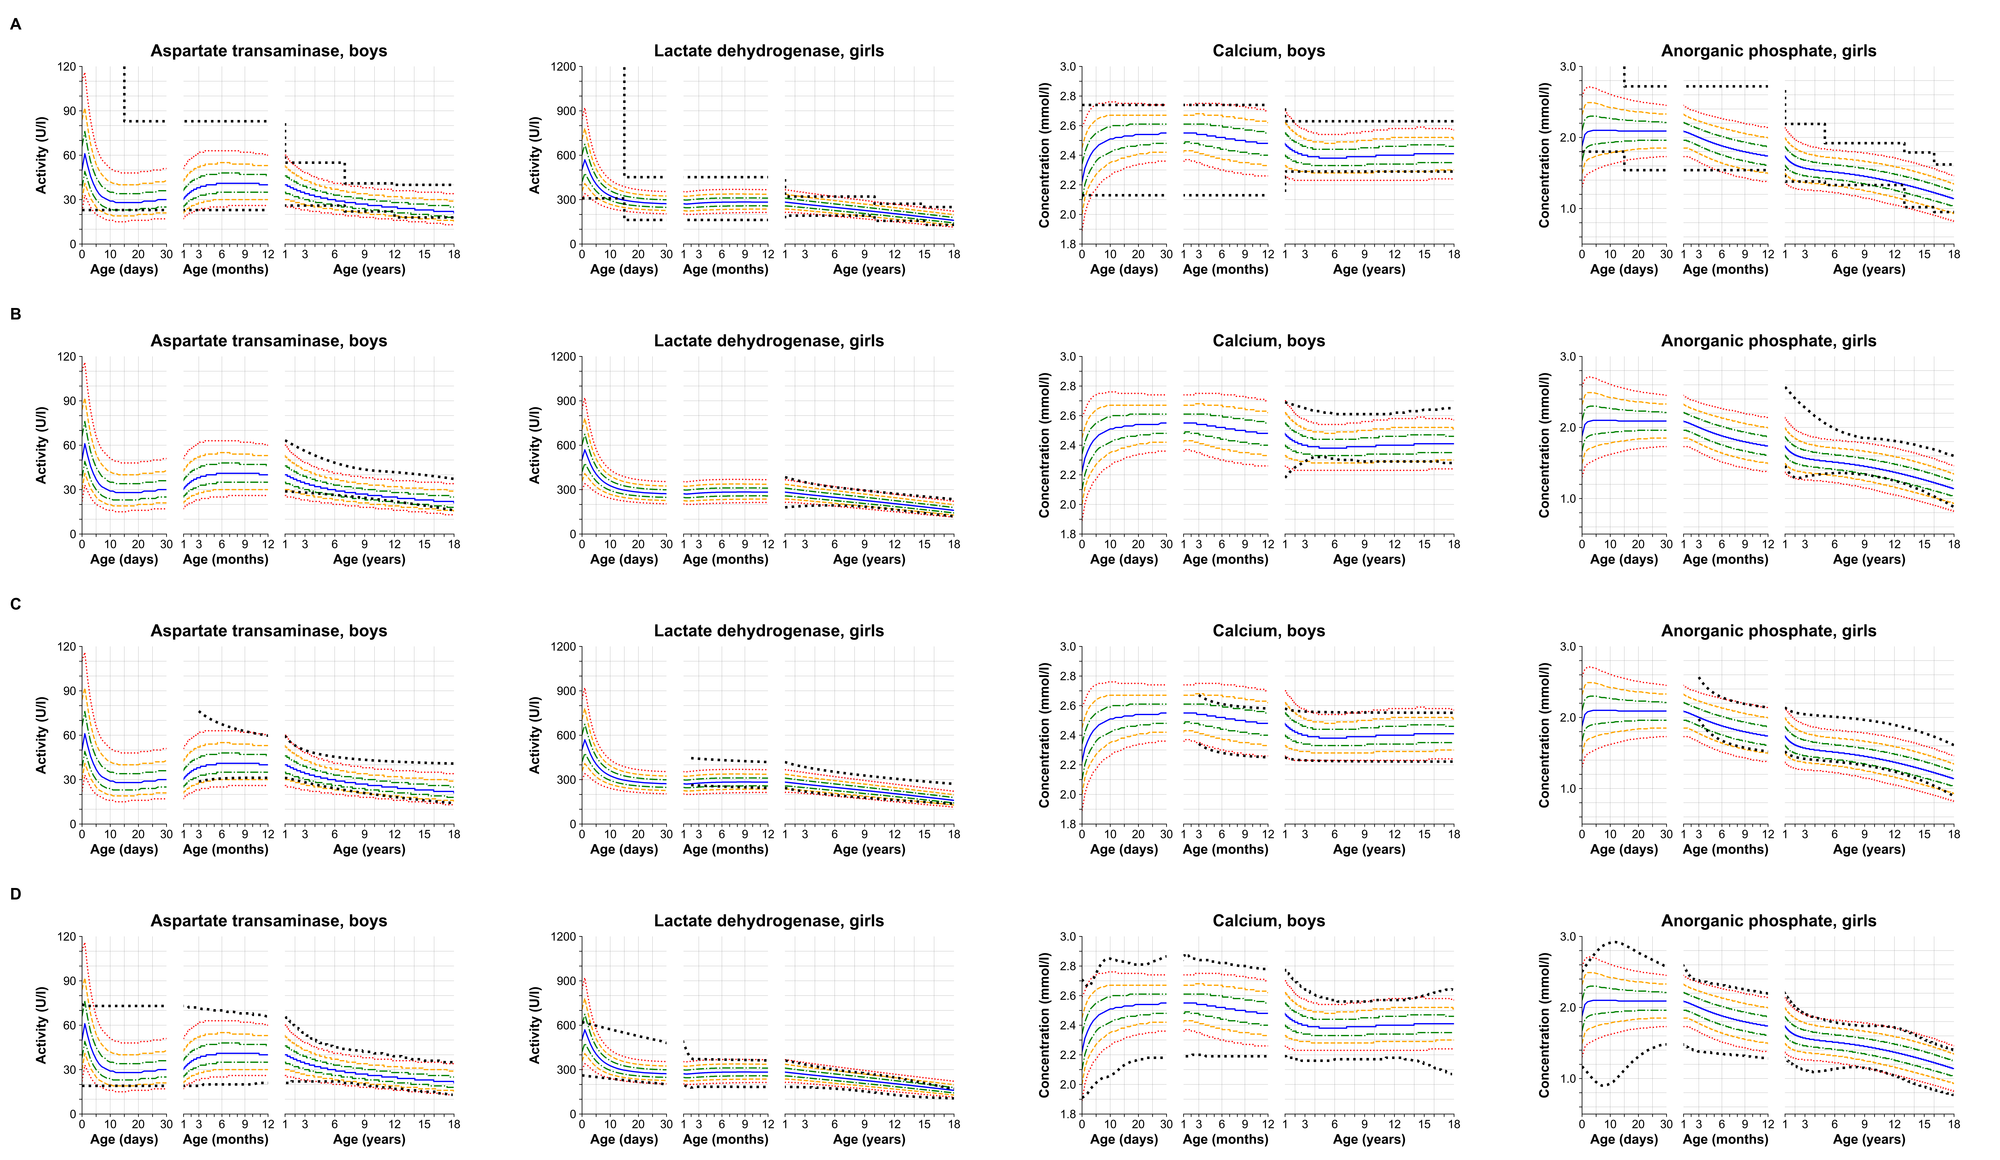


**Comparison of reference intervals to discrete (A) and continuous (B) reference intervals from the CALIPER project, to HAPPI Kids (C) results, and to previous results from our group (D).**

Age- and sex-dependent percentile charts for aspartate transaminase (AST), Lactate dehydrogenase (LDH), calcium, and anorganic phosphate showing the 50th percentile (solid blue lines), 25th and 75th percentiles (dashed green lines), 10th and 90th percentiles (dash-dotted yellow lines), and 2.5th and 97.5th percentiles (dotted red lines). Panels A and B shows our results in comparison to reference intervals from the CALIPER study (dashed black lines, [26] and [6], Abbott ARCHITECT c8000), and panel C compares our results to HAPPI Kids data (dashed black lines, [7] , measured on 5 different analyzers*). A comparison of this report’s results to previously reported reference intervals from our group (dashed black lines, [11]) is shown in Panel D. The upper reference limits from CALIPER in neonates 0-15 days in panel A are outside the panel region (AST: 186 U/l, LDH: 1.222 U/l, phosphate: 3.4 mmol/l) to enable identical y-axes in all figures. CALIPER: Canadian Laboratory Initiative on Pediatric Reference Intervals, HAPPI Kids: Harmonising Age Pathology Parameters in Kids. *Samples were measured on Ortho Clinical Diagnostics Vitros 5600, Abbott Architect c8000, Roche Cobas c701, Siemens ADVIA 1800, and Beckman Coulter AU5800 analyzers and common reference intervals are reported.

# Supplemental Method details

**Details regarding the exclusion of individual centers’ analytes:**

We excluded potassium measurements from centers E and H, creatinine from center E, albumin from center G, AST from center H, ALT from center M, and magnesium from center H. This exclusion was performed primarily data-driven, i.e. by analysis of center-specific medians in comparison to the all-center median and the other centers’ medians and under consideration of published Total Error criteria. A subsequent analysis of the excluded analytes and centers shows the following differences:

- Centers E and H are laboratory service providers serving mainly private practices, resulting in much longer storage/transportation time of blood samples (as opposed to the other centers, which are located in the hospitals they serve), explaining the exclusion of potassium from these centers due to more hemolysis.
- Creatinine in center E is measured using Jaffé, as opposed to the other centers, which use enzymatic methods (or reflex testing with enzymatic methods in case of interferences [center D only]).
- Albumin in center G is measured by an immunoturbimetric assay, as opposed to bromcresol methods.

The remaining exclusions (center H: AST, Magnesium, center M: ALT) cannot be explained by specific differences in measurement methods or pre-analytical differences. As data-driven analysis of center-specific medians has clearly identified the differences listed above, we assume that the remaining exclusions are also due to specific differences, which we attribute to population differences and calibration differences (without being able to definitely prove this).
